# Supplementary material for: Trial of Vaginal Birth After Cesarean (VBAC): External validation of the Polish prediction indices of the VBAC
Source: Research Square preprint supplement (doi:10.21203/rs.3.rs-8330044/v1), 2025-12-17
Supplement: Supplementary file 1 [file ad6142630e1e144ef4279c5d.docx]

**Supplementary materials**

Intrapartum cesarean section hazard ratio (pTi) model for women who give birth after one cesarean section in an undelivered pregnancy14:

pTi = 1/{1+exp[-(weighted sum of factors)]}

where the weighted sum of factors is calculated as follows:

weighted sum of factors = +2.17

+2.23 * Physical labor

-4.69 * Unemployed

-4.85 * Place of residence (20–100 thousand).

-0.14 * Pregnancy weight gain (100 g).

-0.39 * BMI before pregnancy (0.1 kg/m2).

+0.42 * BMI before delivery (0.1 kg/m2).

+1.78 * Past natural childbirth (1).

-0.20 * Week of delivery

-1.74 * Threatened preterm delivery.

-9.11 * Anemia during pregnancy

-3.71 * Gestational diabetes.

-5.61 * Epidural anesthesia in labor

-0.14 * Estimated fetal weight via ultrasound (100 g).

Intrapartum cesarean section hazard ratio (pTi) model for women who give birth after one cesarean section in a term delivery14:

Ti = 1/{1+exp[-(weighted sum of factors)]}

where the weighted sum of factors is calculated as follows:

weighted sum of factors = -4.77

+0.36 * Physical labor

+0.57 * Place of residence (> 100 thousand).

+0.01 * Pregnancy weight gain (100 g).

-0.06 * Body weight before delivery

+0.02 * BMI before pregnancy (1 kg/m2).

-0.79 * Natural childbirth experience.

+0.10 * Week of delivery

-1.44 * Threatened preterm delivery

+1.64 * Prepregnancy diabetes mellitus

-0.49 * Epidural anesthesia in labor

-0.03 * Estimated fetal weight via ultrasound (100 g).
